# Supplementary material for: Sewage Sludge ZnCl2-Activated Carbon Intercalated MgFe–LDH Nanocomposites: Insight of the Sorption Mechanism of Improved Removal of Phenol from Water
Source: MDPI journal article supplement (doi:10.3390/ijms21051563), 2020-02-25
Supplement: s1 [file s1]

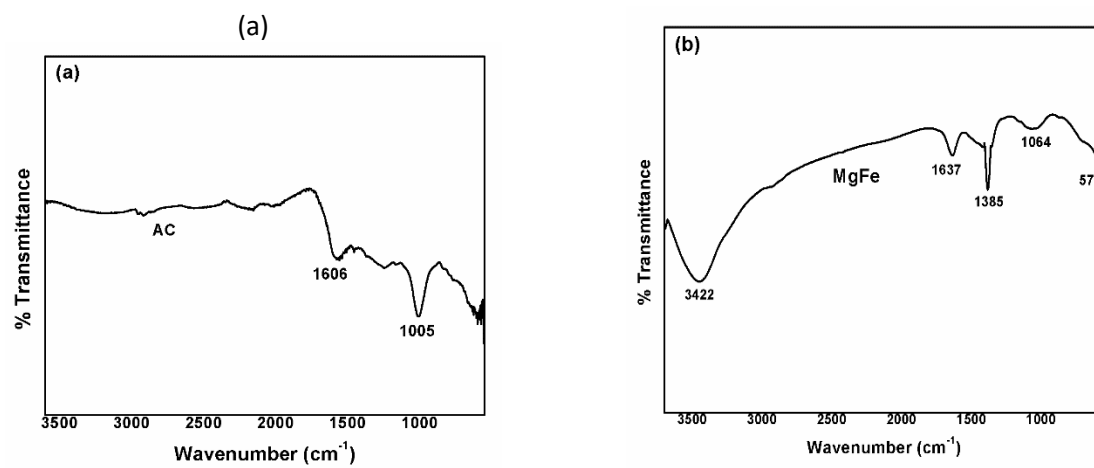

Figure S1. FTIR of AC (a) and MgFe (b)

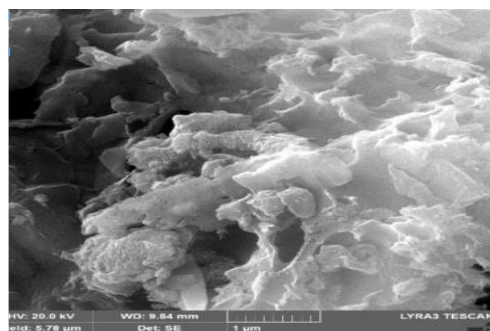

Figure S2: SEM micrographs of the Zn-SBAC
